# Supplementary material for: Highly efficient and thermally stable broadband near-infrared emitting fluoride Cs2KGaF6:Cr3+ for multiple LED applications
Source: Royal Society of Chemistry journal article supplement (doi:10.1039/d2tc02020c), 2022-01-01
Supplement: d2tc02020c1.pdf [file d2tc02020c1.pdf]

## Electronic Supplementary Material (ESI) for Journal of Materials Chemistry C.

This journal is © The Royal Society of Chemistry 2022

### Supplementary Information

#### Highly Efficient and Thermally Stable Broadband Near-Infrared Emitting Fluoride $\text{Cs}_2\text{KGaF}_6:\text{Cr}^{3+}$ for Multiple LED Applications

Zixuan Wu<sup>a</sup>, Xinxin Han<sup>a,b\*</sup>, Juan Wang<sup>a</sup>, Yayun Zhou<sup>b</sup>, Ke Xing<sup>a</sup>, Sheng Cao<sup>a</sup>, Jialong Zhao<sup>a</sup>, Bingsuo Zou<sup>a\*</sup> and Ruosheng Zeng<sup>a\*</sup>

<sup>a</sup> School of Physical Science and Technology, MOE Key Laboratory of New Processing Technology for Non-ferrous Metals and Materials, Guangxi Key Laboratory of Processing for Non-ferrous Metals and Featured Materials, Guangxi University, Nanning 530004, China.

<sup>b</sup> State Key Laboratory of Luminescent Materials and Devices, Guangdong Provincial Key Laboratory of Fiber Laser Materials and Applied Techniques, South China University of Technology, Guangzhou 510641, China.

\* Corresponding authors E-mails: xxhan@gxu.edu.cn (Xinxin Han); zoubs@gxu.edu.cn (Bingsuo Zou); zengrsh@guet.edu.cn (Ruosheng Zeng)

**Table S1** The doping concentration of Cr<sup>3+</sup> measured by ICP optical emission spectroscopy.

| <b>Theoretical concentration/mol%</b> | <b>Actual concentration/mol%</b> |
|---------------------------------------|----------------------------------|
| 1%                                    | 1.08%                            |
| 5%                                    | 4.81%                            |
| 10%                                   | 10.89%                           |
| 15%                                   | 16.02%                           |
| 20%                                   | 21.12%                           |

**Table S2** Atomic coordinates and isotropic displacement parameters ( $\text{\AA}^2$ ) for  $\text{Cs}_2\text{KGa}_1\text{F}_6\text{:}x\text{Cr}^{3+}$  ( $x=0\text{-}21.12\%$ ).

| $\text{Cr}^{3+}$<br>content | atom | $x$      | $y$  | $z$  | $B_{\text{iso}}$ | <i>Occ.</i> |
|-----------------------------|------|----------|------|------|------------------|-------------|
| 0%                          | Cs   | 0.25     | 0.25 | 0.25 | 1.97             | 1           |
|                             | K    | 0.5      | 0.5  | 0.5  | 1.84             | 1           |
|                             | Ga   | 0        | 0    | 0    | 1.07             | 1           |
|                             | F    | 0.209981 | 0    | 0    | 2.21             | 1           |
| 1.08%                       | Cs   | 0.25     | 0.25 | 0.25 | 1.84             | 1           |
|                             | K    | 0.5      | 0.5  | 0.5  | 2.14             | 1           |
|                             | Ga   | 0        | 0    | 0    | 1.10(5)          | 0.9635      |
|                             | F    | 0.213307 | 0    | 0    | 2.70             | 1           |
|                             | Cr   | 0        | 0    | 0    | 0.95(5)          | 0.0365      |
| 4.81%                       | Cs   | 0.25     | 0.25 | 0.25 | 2.03             | 1           |
|                             | K    | 0.5      | 0.5  | 0.5  | 1.42             | 1           |
|                             | Ga   | 0        | 0    | 0    | 1.41(5)          | 0.9580      |
|                             | F    | 0.210291 | 0    | 0    | 2.03             | 1           |
|                             | Cr   | 0        | 0    | 0    | 0.92(5)          | 0.0420      |
| 10.89%                      | Cs   | 0.25     | 0.25 | 0.25 | 2.17             | 1           |
|                             | K    | 0.5      | 0.5  | 0.5  | 1.58             | 1           |
|                             | Ga   | 0        | 0    | 0    | 1.30(5)          | 0.9209      |
|                             | F    | 0.231395 | 0    | 0    | 1.98             | 1           |
|                             | Cr   | 0        | 0    | 0    | 0.77(5)          | 0.0791      |
| 16.02%                      | Cs   | 0.25     | 0.25 | 0.25 | 1.95             | 1           |
|                             | K    | 0.5      | 0.5  | 0.5  | 1.49             | 1           |
|                             | Ga   | 0        | 0    | 0    | 1.37(5)          | 0.9110      |
|                             | F    | 0.213161 | 0    | 0    | 2.24             | 1           |
|                             | Cr   | 0        | 0    | 0    | 0.87(5)          | 0.0890      |
| 21.12%                      | Cs   | 0.25     | 0.25 | 0.25 | 1.79             | 1           |
|                             | K    | 0.5      | 0.5  | 0.5  | 1.81             | 1           |
|                             | Ga   | 0        | 0    | 0    | 1.16             | 0.880(18)   |
|                             | F    | 0.214594 | 0    | 0    | 2.77             | 1           |
|                             | Cr   | 0        | 0    | 0    | 0.83             | 0.120(18)   |

**Table S3** Rietveld refinement data for Cs<sub>2</sub>KGa<sub>1-x</sub>F<sub>6</sub>:xCr<sup>3+</sup> (x=0-21.12%).

| Cr <sup>3+</sup><br>content | Space<br>group       | <i>a</i> (Å) | $\alpha=\beta=\gamma$<br>(°) | <i>Z</i> | <i>V</i> (Å <sup>3</sup> ) | <i>R</i> <sub>wp</sub> / <i>R</i> <sub>p</sub> / $\chi^2$ |
|-----------------------------|----------------------|--------------|------------------------------|----------|----------------------------|-----------------------------------------------------------|
| 0%                          |                      | 8.989610(20) |                              |          | 726.4781(28)               | 7.07%/5.39%/3.150                                         |
| 1.08%                       |                      | 8.988504(20) |                              |          | 726.2101(28)               | 8.17%/5.78%/4.125                                         |
| 4.81%                       | <i>Fm</i> $\bar{3}m$ | 8.986817(19) | 90                           | 4        | 725.8013(27)               | 7.54%/5.50%/3.467                                         |
| 10.89%                      |                      | 8.985558(25) |                              |          | 725.4961(25)               | 7.57%/5.50%/3.448                                         |
| 16.02%                      |                      | 8.985383(18) |                              |          | 725.4539(25)               | 7.62%/5.42%/3.568                                         |
| 21.12%                      |                      | 8.985026(20) |                              |          | 725.3674(28)               | 7.71%/5.49%/3.552                                         |

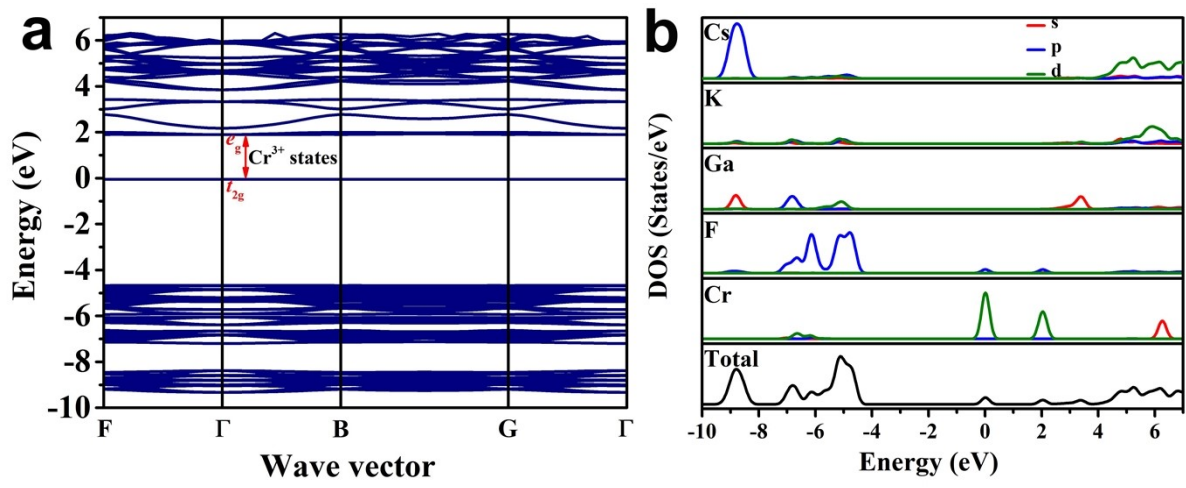

**Fig. S1** (a) Band structure and (b) TDOS and PDOS of  $\text{Cs}_2\text{KGaF}_6:\text{Cr}^{3+}$ .

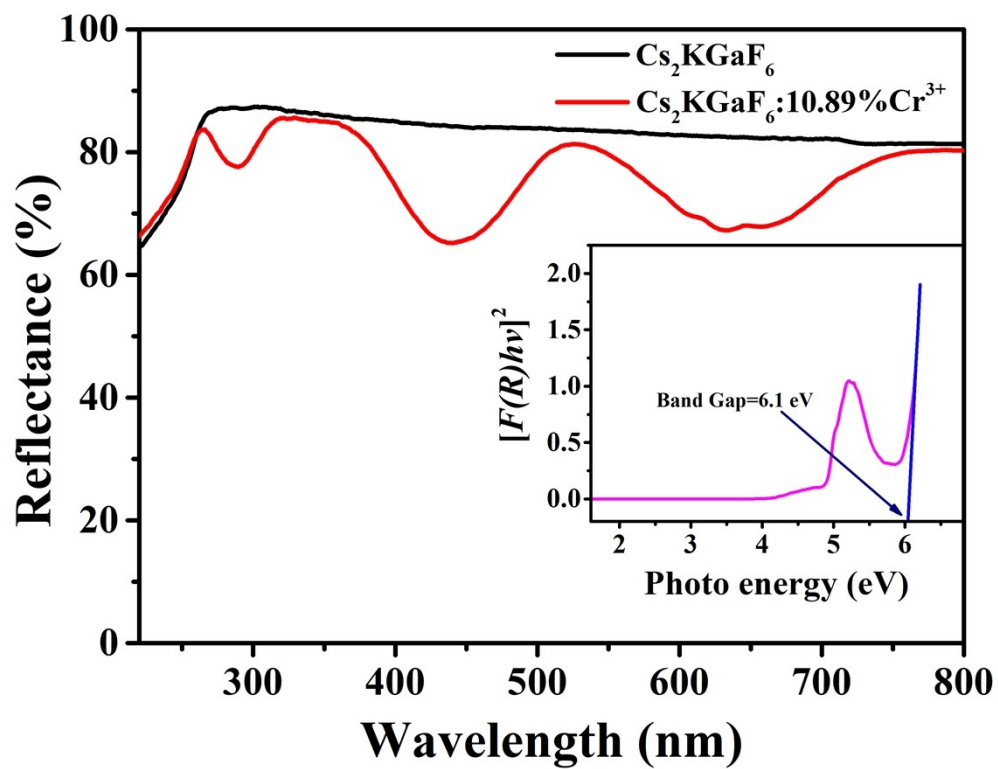

**Fig. S2** DRS of  $\text{Cs}_2\text{KGaF}_6$  and  $\text{Cs}_2\text{KGaF}_6:10.89\%\text{Cr}^{3+}$ . The inset shows the band gap calculation of  $\text{Cs}_2\text{KGaF}_6$ .

**Table S4** The decay curves fitting data of Cs<sub>2</sub>KGa<sub>1-x</sub>F<sub>6</sub>:xCr<sup>3+</sup> (x=0-21.12%).

| Cr <sup>3+</sup> content | A <sub>1</sub> | τ <sub>1</sub> | A <sub>2</sub> | τ <sub>2</sub> | τ       |
|--------------------------|----------------|----------------|----------------|----------------|---------|
| 1.08%                    | 0.44648        | 0.26975        | 0.44648        | 0.26975        | 0.26975 |
| 4.81%                    | 0.43527        | 0.26383        | 0.43527        | 0.26383        | 0.26383 |
| 10.89%                   | 0.83826        | 0.26104        | 0.09991        | 0.05308        | 0.25612 |
| 16.02%                   | 0.63487        | 0.28074        | 0.29694        | 0.09754        | 0.25513 |
| 21.12%                   | 0.66835        | 0.26531        | 0.31266        | 0.07371        | 0.24328 |

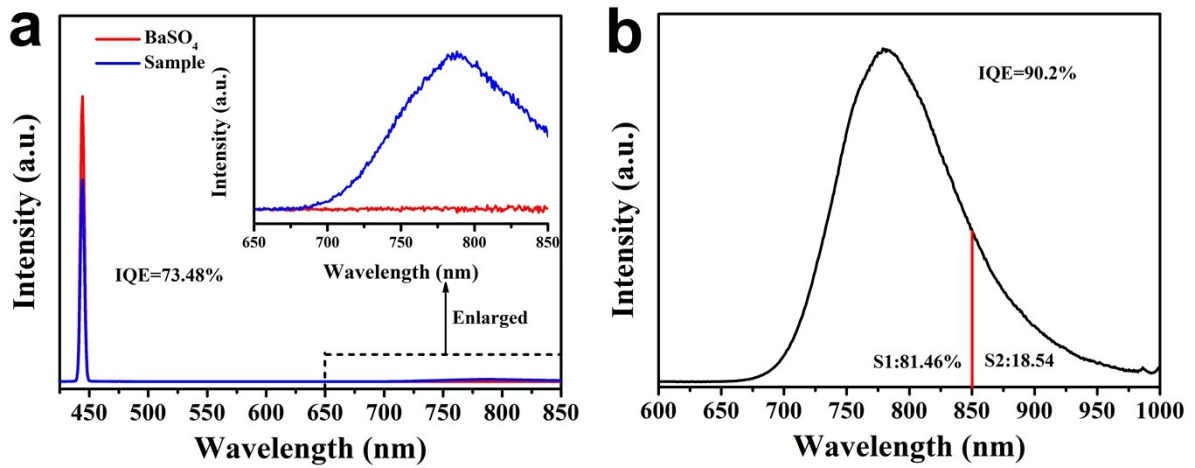

**Fig. S3** (a) Excitation and emission spectra of BaSO<sub>4</sub> and phosphor sample Cs<sub>2</sub>KGaF<sub>6</sub>:10.89%Cr<sup>3+</sup>. (b) Emission spectrum of Cs<sub>2</sub>KGaF<sub>6</sub>:10.89%Cr<sup>3+</sup>. The S1 and S2 in Fig. S2b present the emission spectrum parts of 600-850 nm and 850-1000 nm, respectively. The integrated emission intensity ratios of S1 and S2 to that of (S1+S2) are calculated to be about 81.46% and 18.54%, respectively. Meanwhile, the IQE of S1 is determined as 73.48%, thus the IQE of the whole NIR emission of the sample can be calculate as 73.48%/81.54%  $\approx$  90.2%.



**Table S5** PL properties of some Cr<sup>3+</sup>-activated phosphors and photoelectric properties of the fabricated NIR pc-LEDs.

| Phosphor                                                                                                | $\lambda_{\text{ex}}$<br>(nm) | $\lambda_{\text{em}}$<br>(nm) | FWHM<br>(nm) | $I_{150^\circ\text{C}}$<br>(%) | IQE<br>(%)  | Input<br>power<br>(mW) | NIR output power<br>(mW)@photoelect<br>ric efficiency | Ref.        |
|---------------------------------------------------------------------------------------------------------|-------------------------------|-------------------------------|--------------|--------------------------------|-------------|------------------------|-------------------------------------------------------|-------------|
| BaMgAl <sub>10</sub> O <sub>17</sub> :Cr <sup>3+</sup>                                                  | 398                           | 762                           | 92.6         | 63                             | 94          | -                      | 3.4@-                                                 | 1           |
| InBO <sub>3</sub> :Cr <sup>3+</sup>                                                                     | 480                           | 820                           | 138          | 50                             | 46.3        | 360                    | 37.5@10.42%                                           | 2           |
| LiScP <sub>2</sub> O <sub>7</sub> :Cr <sup>3+</sup>                                                     | 470                           | 880                           | 170          | 20                             | 38          | 300                    | 19@7%                                                 | 3           |
| LiScP <sub>2</sub> O <sub>7</sub> :Cr <sup>3+</sup> ,Yb <sup>3+</sup>                                   | 470                           | 880                           | 210          | 60                             | 74          | 300                    | 36@12%                                                | 3           |
| YAl <sub>3</sub> (BO <sub>3</sub> ) <sub>4</sub> :Cr <sup>3+</sup> ,Yb <sup>3+</sup>                    | 450                           | -                             | -            | 80                             | -           | 300                    | 26@8.6%                                               | 4           |
| Ca <sub>2</sub> LuZr <sub>2</sub> Al <sub>3</sub> O <sub>12</sub> :Cr <sup>3+</sup>                     | 460                           | 754                           | 117          | 60                             | 69          | 60                     | 2.448@4.1%                                            | 5           |
| NaInGe <sub>2</sub> O <sub>6</sub> :Cr <sup>3+</sup>                                                    | 480                           | 900                           | 175          | 25                             | 34          | -                      | 25@4.85%                                              | 6           |
| Ca <sub>9</sub> Ga(PO <sub>4</sub> ) <sub>7</sub> :Cr <sup>3+</sup>                                     | 440                           | 735                           | -            | 68.5                           | 55.7        | -                      | -                                                     | 7           |
| CaSc <sub>1-x</sub> Al <sub>1+x</sub> SiO <sub>6</sub> :Cr <sup>3+</sup>                                | 460                           | 950                           | 205          | ~54                            | 30          | -                      | -                                                     | 8           |
| Y <sub>2</sub> CaAl <sub>4</sub> SiO <sub>12</sub> :Cr <sup>3+</sup>                                    | 440                           | 760                           | 160          | 90.6                           | 90.1        | 300                    | 62.6@21.2%                                            | 8           |
| Ca <sub>3-x</sub> Lu <sub>x</sub> Ga <sub>2+x</sub> Ge <sub>3-x</sub> O <sub>12</sub> :Cr <sup>3+</sup> | 460                           | 803                           | 267          | 90                             | -           | 300                    | 27.1@16.3%                                            | 10          |
| ScBO <sub>3</sub> :Cr <sup>3+</sup>                                                                     | 450                           | 800                           | 120          | 51                             | 65          | 371                    | 26@7%                                                 | 11          |
| Ca <sub>3</sub> Sc <sub>2</sub> Si <sub>3</sub> O <sub>12</sub> :Cr <sup>3+</sup>                       | 460                           | 770                           | 110          | 97.4                           | 92.3        | 2892                   | 109.9@3.8%                                            | 12          |
| K <sub>3</sub> GaF <sub>6</sub> :Cr <sup>3+</sup>                                                       | 442                           | 750                           | -            | -                              | 28          | 1050                   | 8@<1%                                                 | 13          |
| K <sub>3</sub> ScF <sub>6</sub> :Cr <sup>3+</sup>                                                       | 432                           | 770                           | 120          | 87.3                           | 71.7        | 350                    | 32.56564@9.315                                        | 14          |
| K <sub>3</sub> AlF <sub>6</sub> :Cr <sup>3+</sup>                                                       | 430                           | 763                           | 112          | -                              | 31.4        | 1050                   | 5.5@<1%                                               | 15          |
| K <sub>2</sub> NaScF <sub>6</sub> :Cr <sup>3+</sup>                                                     | 435                           | 765                           | 100          | 89.6                           | 74          | 1094                   | 159.72@14.6%                                          | 16          |
| ScF <sub>3</sub> :Cr <sup>3+</sup>                                                                      | 468                           | 853                           | 140          | 85.5                           | 45          | 110                    | 3.51@3.19%                                            | 17          |
| Na <sub>3</sub> ScF <sub>6</sub> :Cr <sup>3+</sup>                                                      | 436                           | 774                           | 108          | 30                             | 91.5        | -                      | 699.8@15.46%                                          | 18          |
|                                                                                                         |                               |                               |              |                                |             | <b>52.68</b>           | <b>11.26@21.37%</b>                                   |             |
| <b>Cs<sub>2</sub>KGaF<sub>6</sub>:Cr<sup>3+</sup></b>                                                   | <b>439</b>                    | <b>782</b>                    | <b>110</b>   | <b>88.7</b>                    | <b>90.2</b> | <b>277.5</b>           | <b>61.18@22.05%</b>                                   | <b>This</b> |
|                                                                                                         |                               |                               |              |                                |             | <b>972.8</b>           | <b>183.81@18.89%</b>                                  | <b>work</b> |

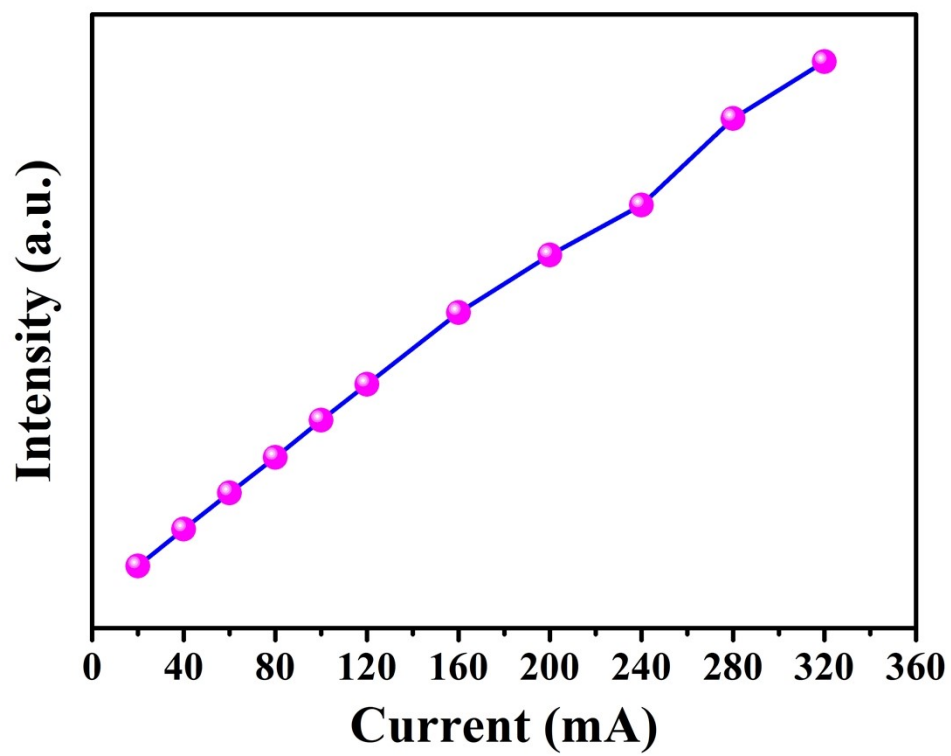

**Fig. S4** Driven current dependent integrated NIR intensity.

**Table S6** Some photoelectric parameters of the fabricated NIR pc-LED under various driven currents.

| <b>Current (mA)</b> | <b>Input electrical power (mW)</b> | <b>NIR output power (mW)</b> | <b>Photoelectric conversion efficiency (%)</b> |
|---------------------|------------------------------------|------------------------------|------------------------------------------------|
| 20                  | 52.68                              | 11.26                        | 21.37                                          |
| 40                  | 107.20                             | 23.84                        | 22.24                                          |
| 60                  | 160.19                             | 36.28                        | 22.64                                          |
| 80                  | 217.17                             | 48.45                        | 22.31                                          |
| 100                 | 277.50                             | 61.18                        | 22.05                                          |
| 120                 | 336.12                             | 73.44                        | 21.85                                          |
| 160                 | 456.64                             | 98.01                        | 21.46                                          |
| 200                 | 580.00                             | 117.63                       | 20.28                                          |
| 240                 | 707.76                             | 134.71                       | 19.03                                          |
| 280                 | 838.32                             | 164.39                       | 19.61                                          |
| 320                 | 972.80                             | 183.808                      | 18.89                                          |

## References

- 1 L. You, R. Tian, T. Zhou and R. Xie, *Chem. Eng. J.*, 2021, **417**, 129224.
- 2 Z. Sun, Q. Ning, W. Zhou, J. Luo, P. Chen, L. Zhou, Q. Pang and X. Zhang, *Ceram. Int.*, 2021, **47**, 13598-13603.
- 3 L. Yao, Q. Shao, S. Han, C. Liang, J. He and J. Jiang, *Chem. Mater.*, 2020, **32**, 2430-2439.
- 4 Q. Shao, H. Ding, L. Yao, J. Xu, C. Liang, Z. Li, Y. Dong and J. Jiang, *Opt. Lett.*, 2018, **43**, 5251-5254.
- 5 L. Zhang, S. Zhang, Z. Hao, X. Zhang, G. Pan, Y. Luo, H. Wu and J. Zhang, *J. Mater. Chem. C*, 2018, **6**, 4967-4976.
- 6 W. Zhou, J. Luo, J. Fan, H. Pan, S. Zeng, L. Zhou, Q. Pang and X. Zhang, *Ceram. Int.*, 2021, **47**, 25343-25349.
- 7 F. Zhao, Z. Song and Q. Liu, *Int. J. Min. Met. and Mater.*, 2022.
- 8 G. Liu, M. S. Molokeev and Z. Xia, *Chem. Mater.*, 2022, **34**, 1376-1384.
- 9 G. Zheng, W. Xiao, J. Wu, X. Liu, H. Masai and J. Qiu, *Adv. Sci.*, 2022, **9**, 2105713.
- 10 T. Lang, M. Cai, S. Fang, T. Han, S. He, Q. Wang, G. Ge, J. Wang, C. Guo, L. Peng, S. Cao, B. Liu, V. I. Korepanov, A. N. Yakovlev and J. Qiu, *Adv. Opt. Mater.*, 2022, **10**, 2101633.
- 11 Q. Shao, H. Ding, L. Yao, J. Xu, C. Liang and J. Jiang, *RSC Adv.*, 2018, **8**, 12035-12042.
- 12 Z. Jia, C. Yuan, Y. Liu, X. Wang, P. Sun, L. Wang, H. Jiang and J. Jiang, *Light sci. appl.*, 2020, **9**, 86.
- 13 C. Lee, Z. Bao, M. Fang, T. Lesniewski, S. Mahlik, M. Grinberg, G. Leniec, S. M. Kaczmarek, M. G. Brik, Y. Tsai, T. Tsai and R. Liu, *Inorg. Chem.*, 2020, **59**, 376-385.
- 14 H. Yu, J. Chen, R. Mi, J. Yang and Y. Liu, *Chem. Eng. J.*, 2021, **417**, 129271.
- 15 Q. Song, Z. Liu, H. Jiang, Z. Luo, P. Sun, G. Liu, Y. Liu, H. Jiang and J. Jiang, *J. Am. Ceram. Soc.*, 2021, **104**, 5235-5243.
- 16 E. Song, H. Ming, Y. Zhou, F. He, J. Wu, Z. Xia and Q. Zhang, *Laser Photonics Rev.*, 2021, **15**, 2000410.
- 17 Q. Lin, Q. Wang, M. Liao, M. Xiong, X. Feng, X. Zhang, H. Dong, D. Zhu, F. Wu and Z. Mu, *ACS Appl. Mater. Inter.*, 2021, **13**, 18274-18282.
- 18 F. He, E. Song, Y. Zhou, H. Ming, Z. Chen, J. Wu, P. Shao, X. Yang, Z. Xia and Q. Zhang, *Adv. Funct. Mater.*, 2021, **31**, 2103743.
